# Supplementary figures and images for: Causation of Acute Flaccid Paralysis by Myelitis and Myositis in Enterovirus-D68 Infected Mice Deficient in Interferon αβ/γ Receptor Deficient Mice
Source: MDPI journal article supplement (doi:10.3390/v10010033), 2018-01-12

#489 EV-D68

left gas.m.

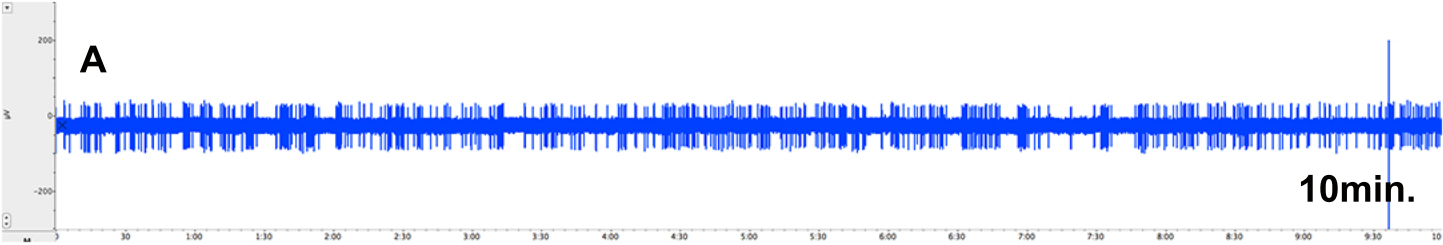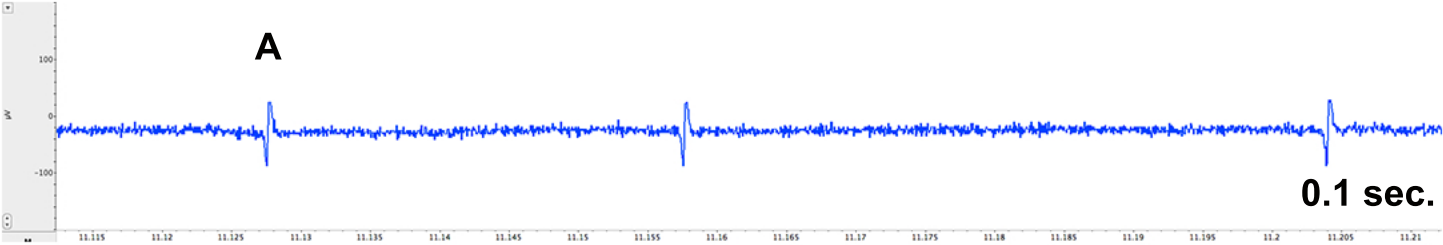

right gas.m.

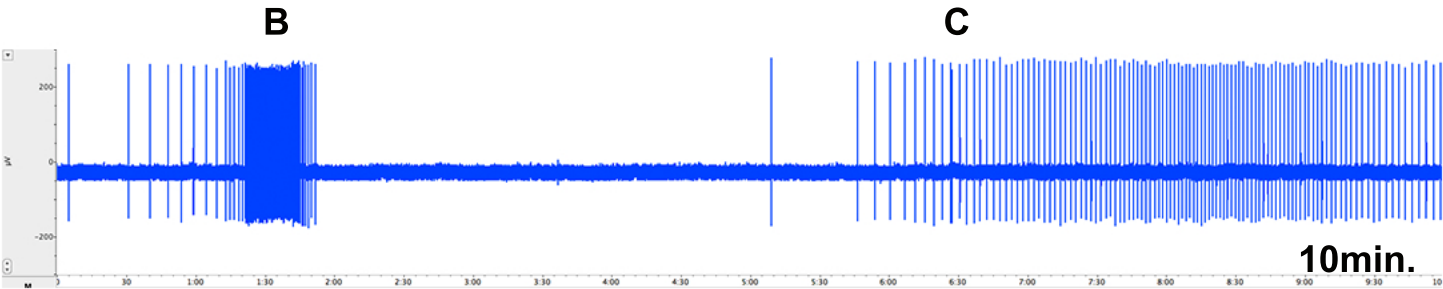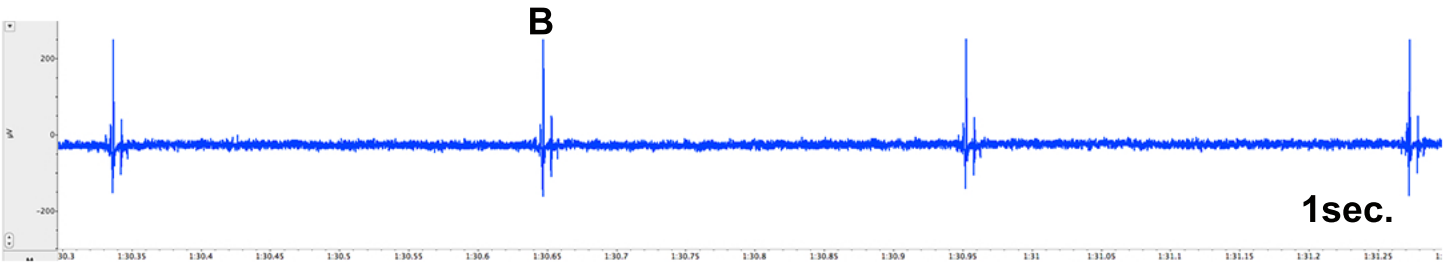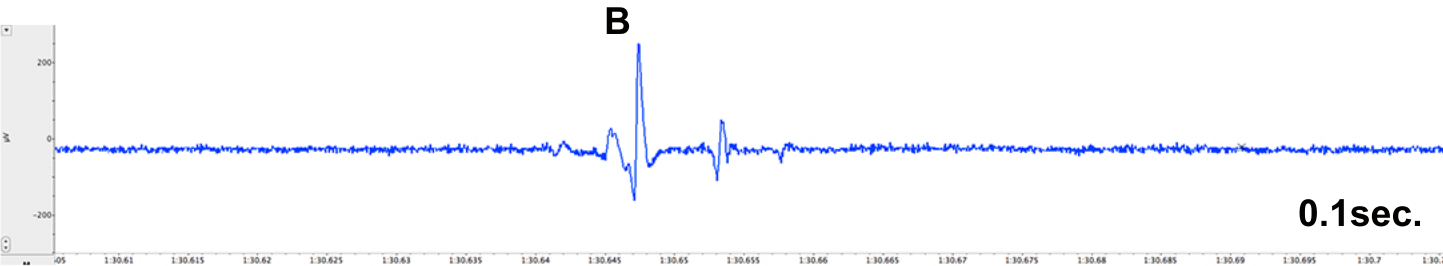

#491 EV-D68

left gas.m.

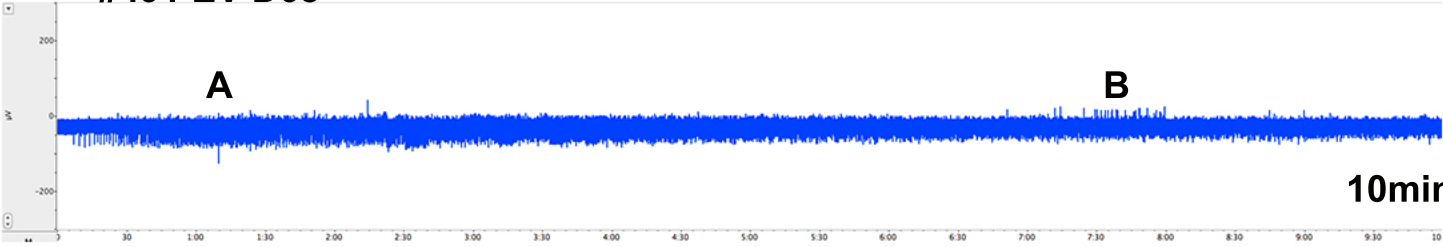

right gas.m.

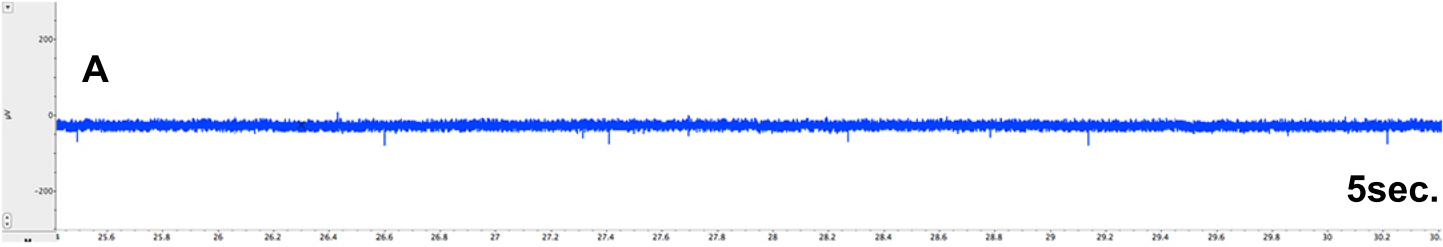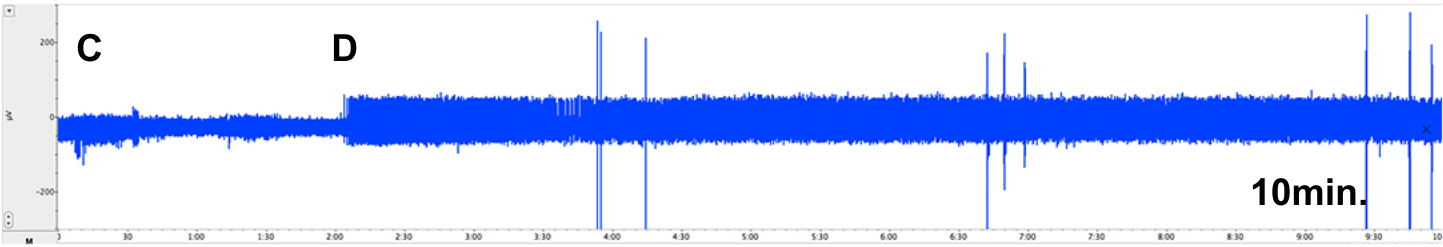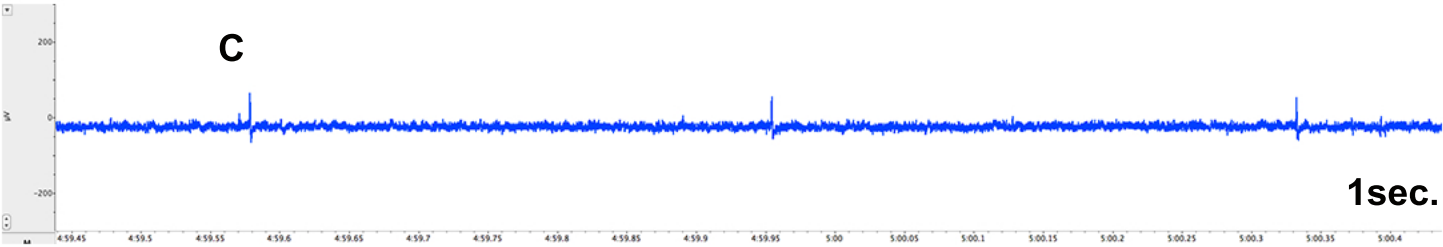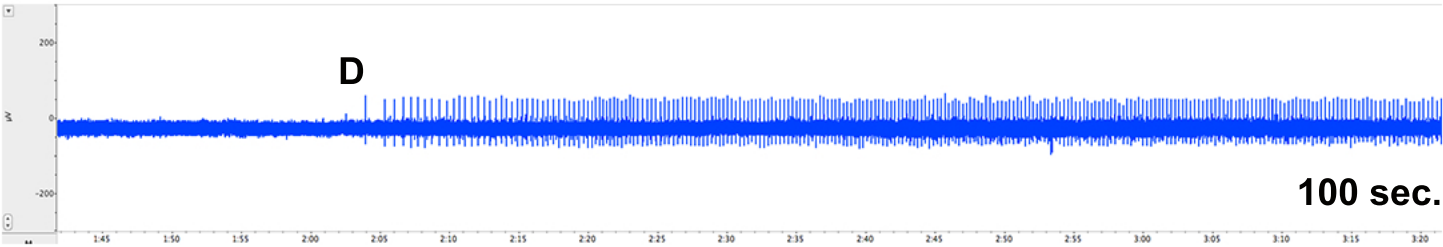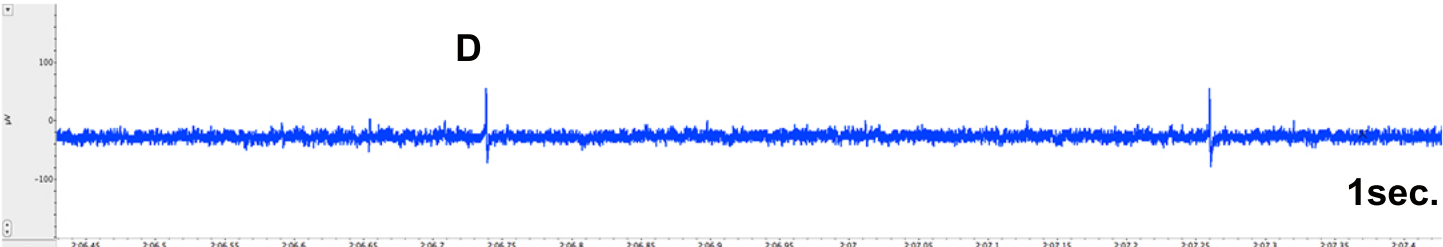

left gas.m.

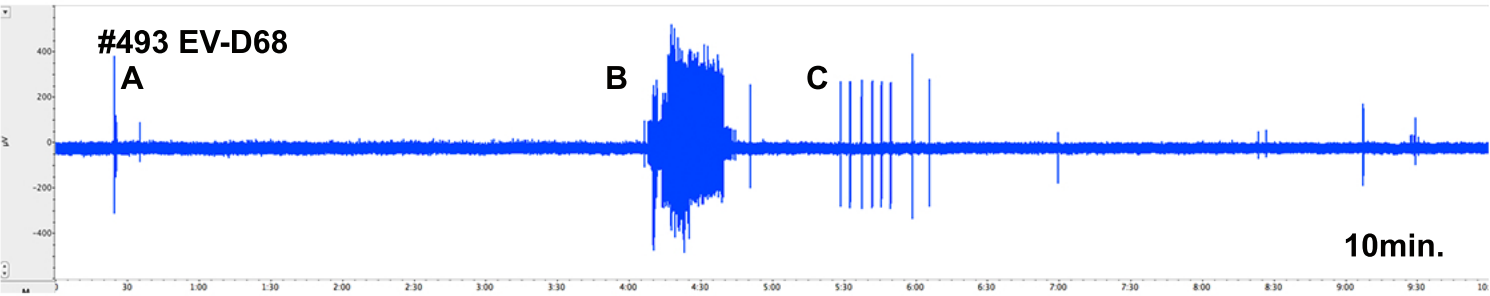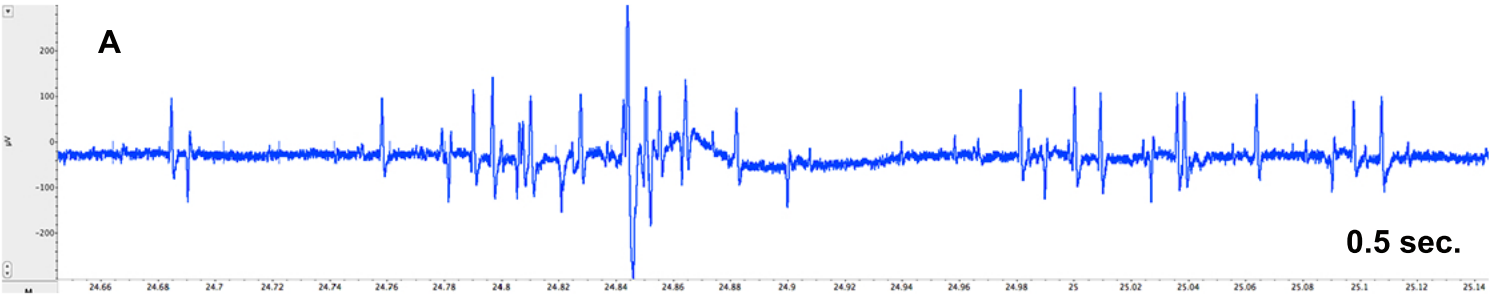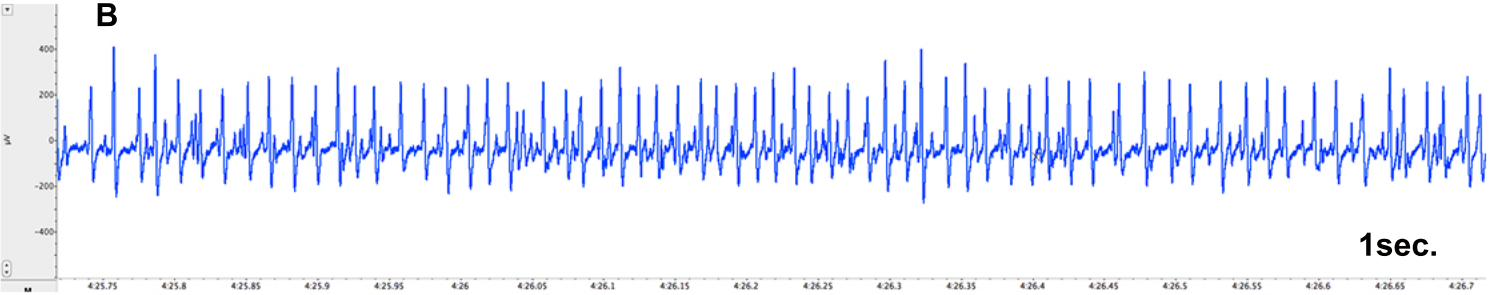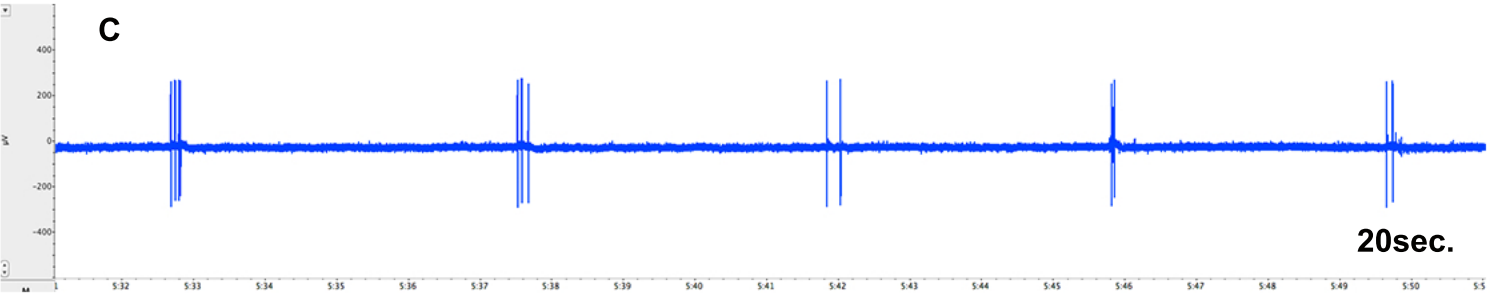

right gas.m.

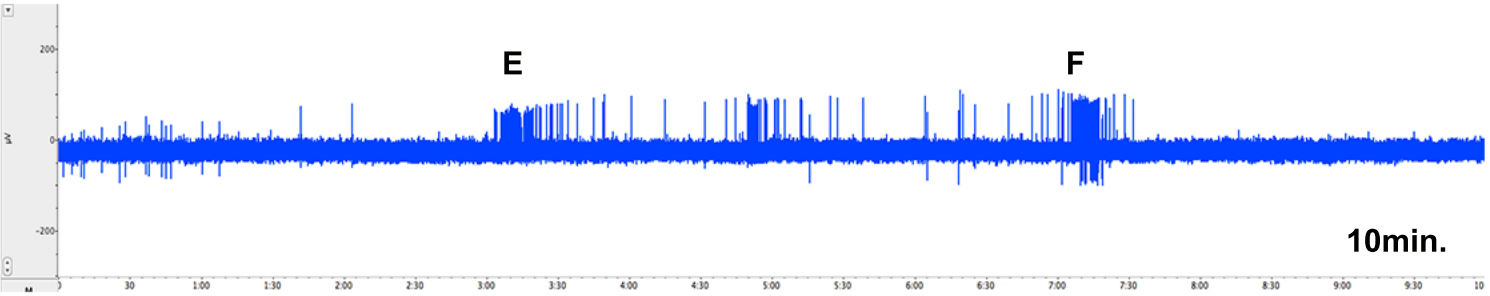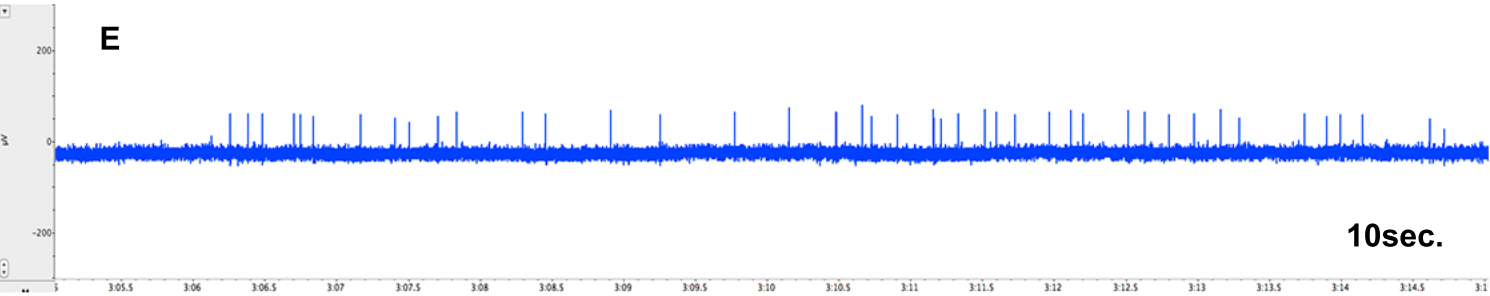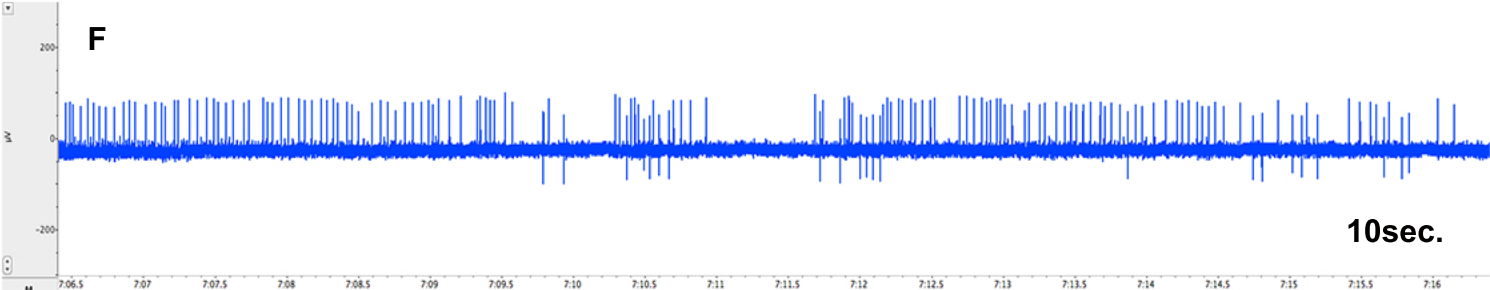

left gas.m.

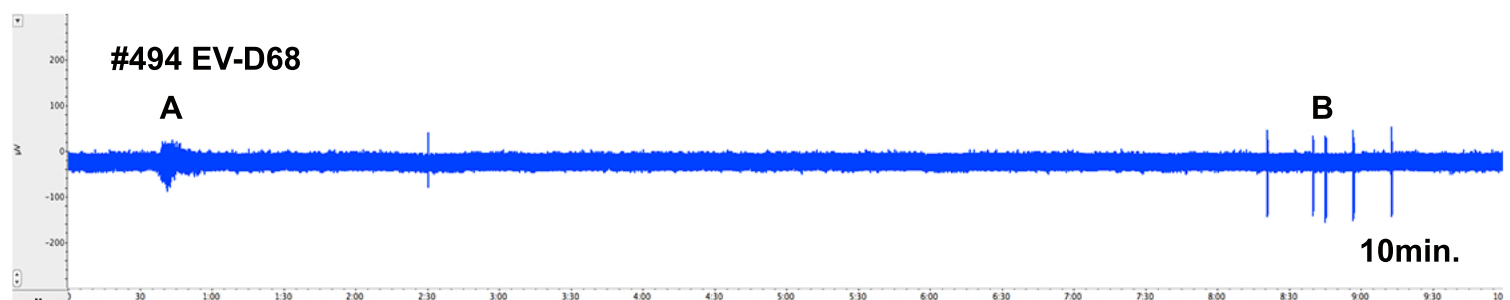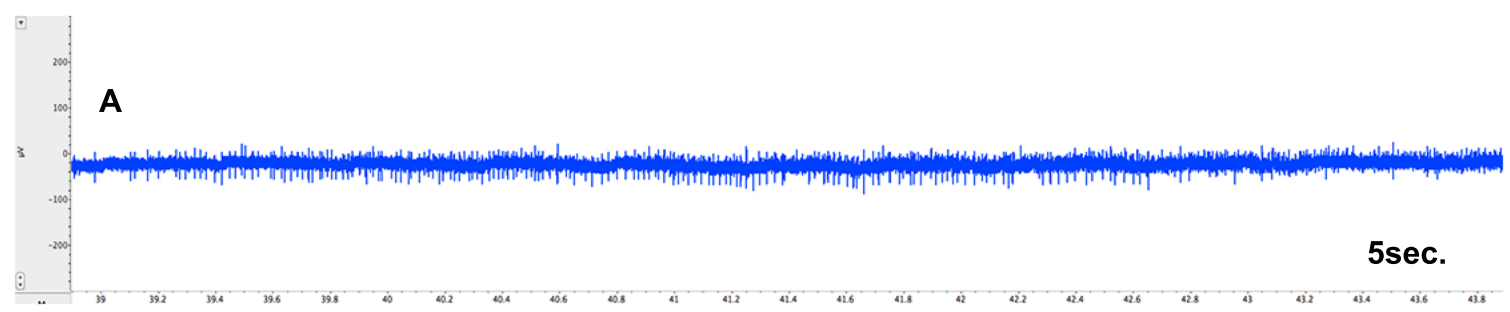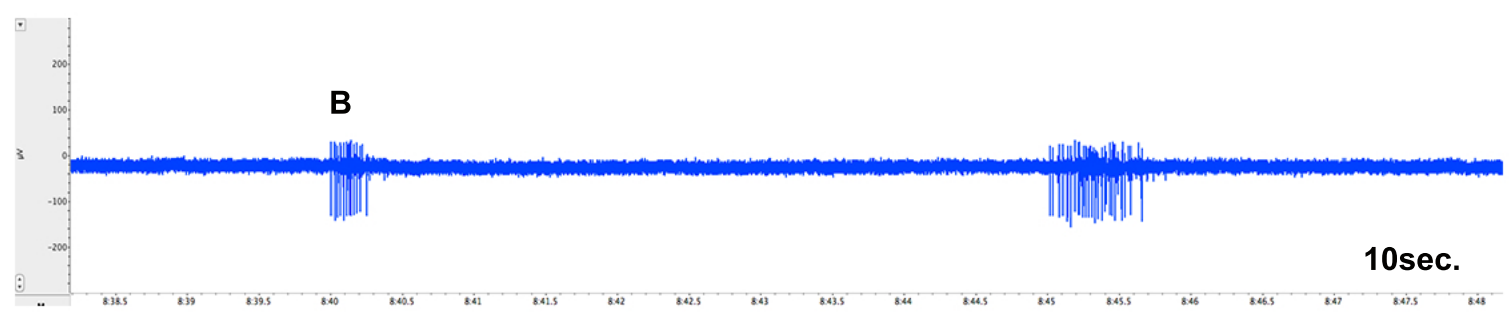

right gas.m.

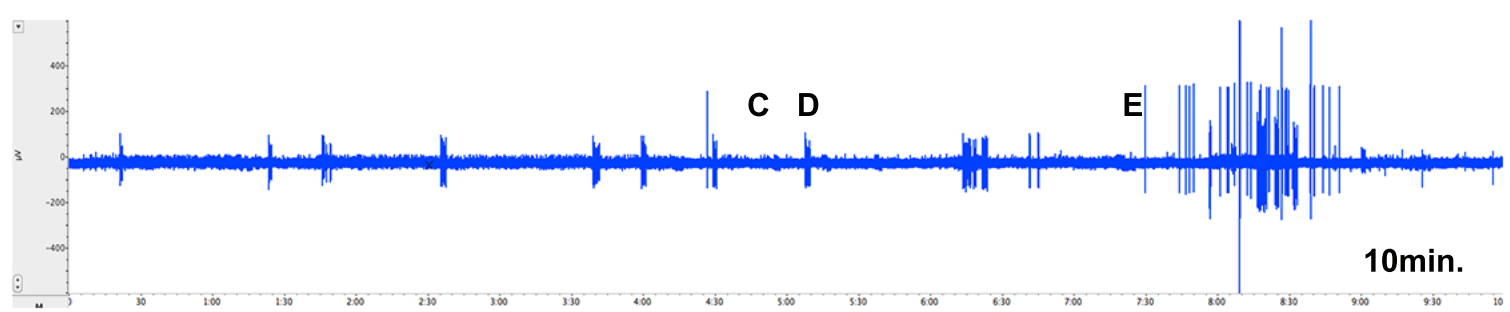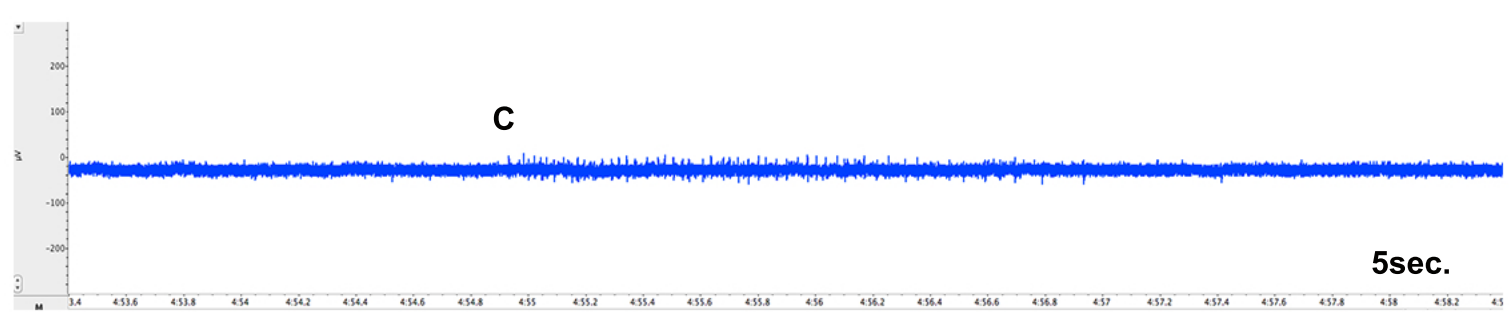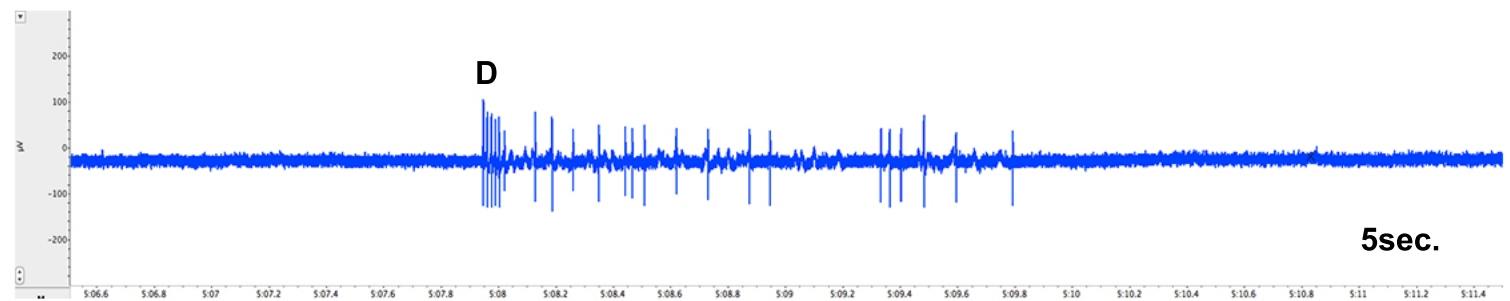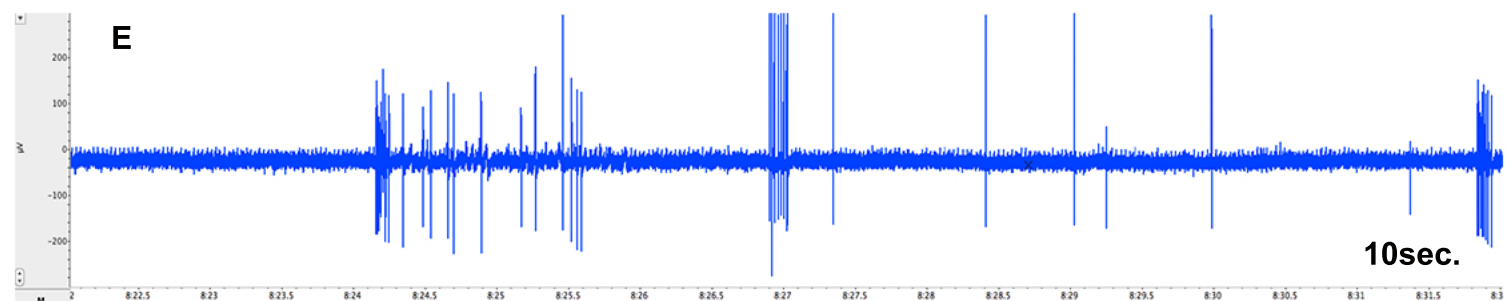

Supplement: s1 [file s1]
